# Supplementary material
Source: PubMed Central journal article supplement (PMC4656108)
Supplement: NIHMS715430-supplement-1.pdf [file NIHMS715430-supplement-1.pdf]

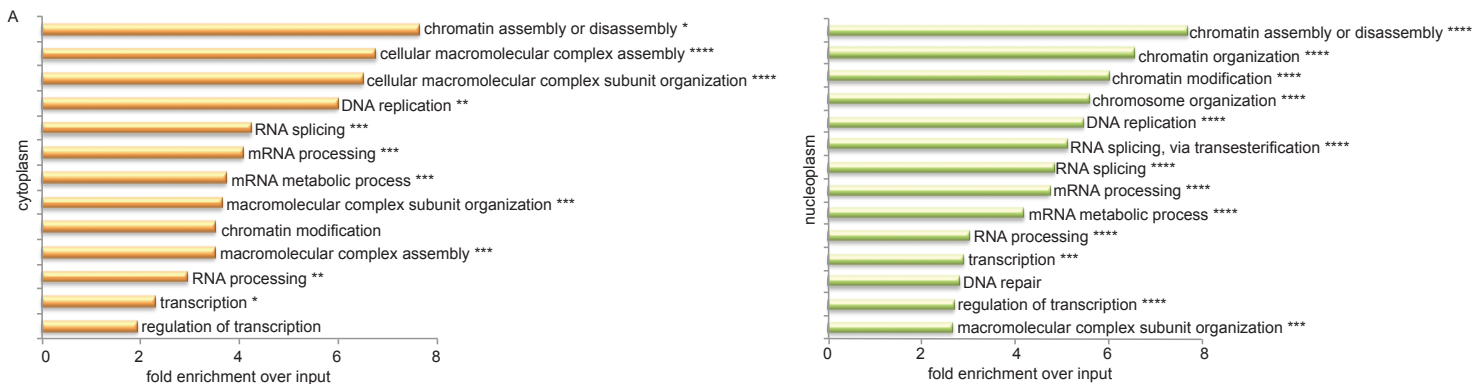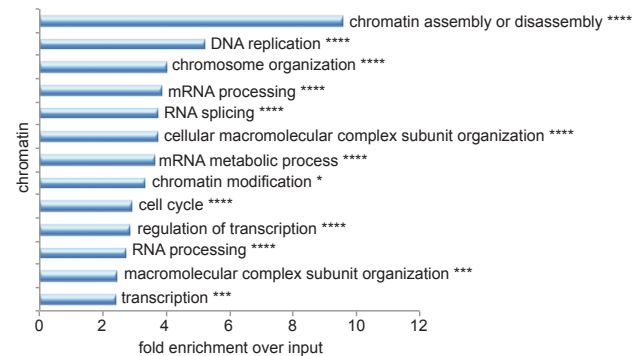

**B**

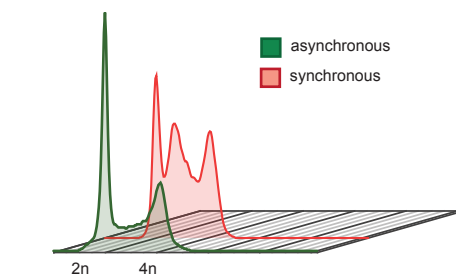

**C**

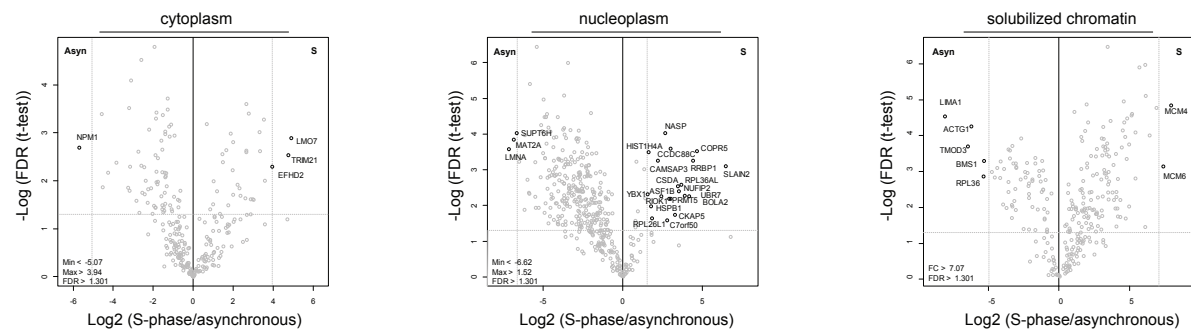

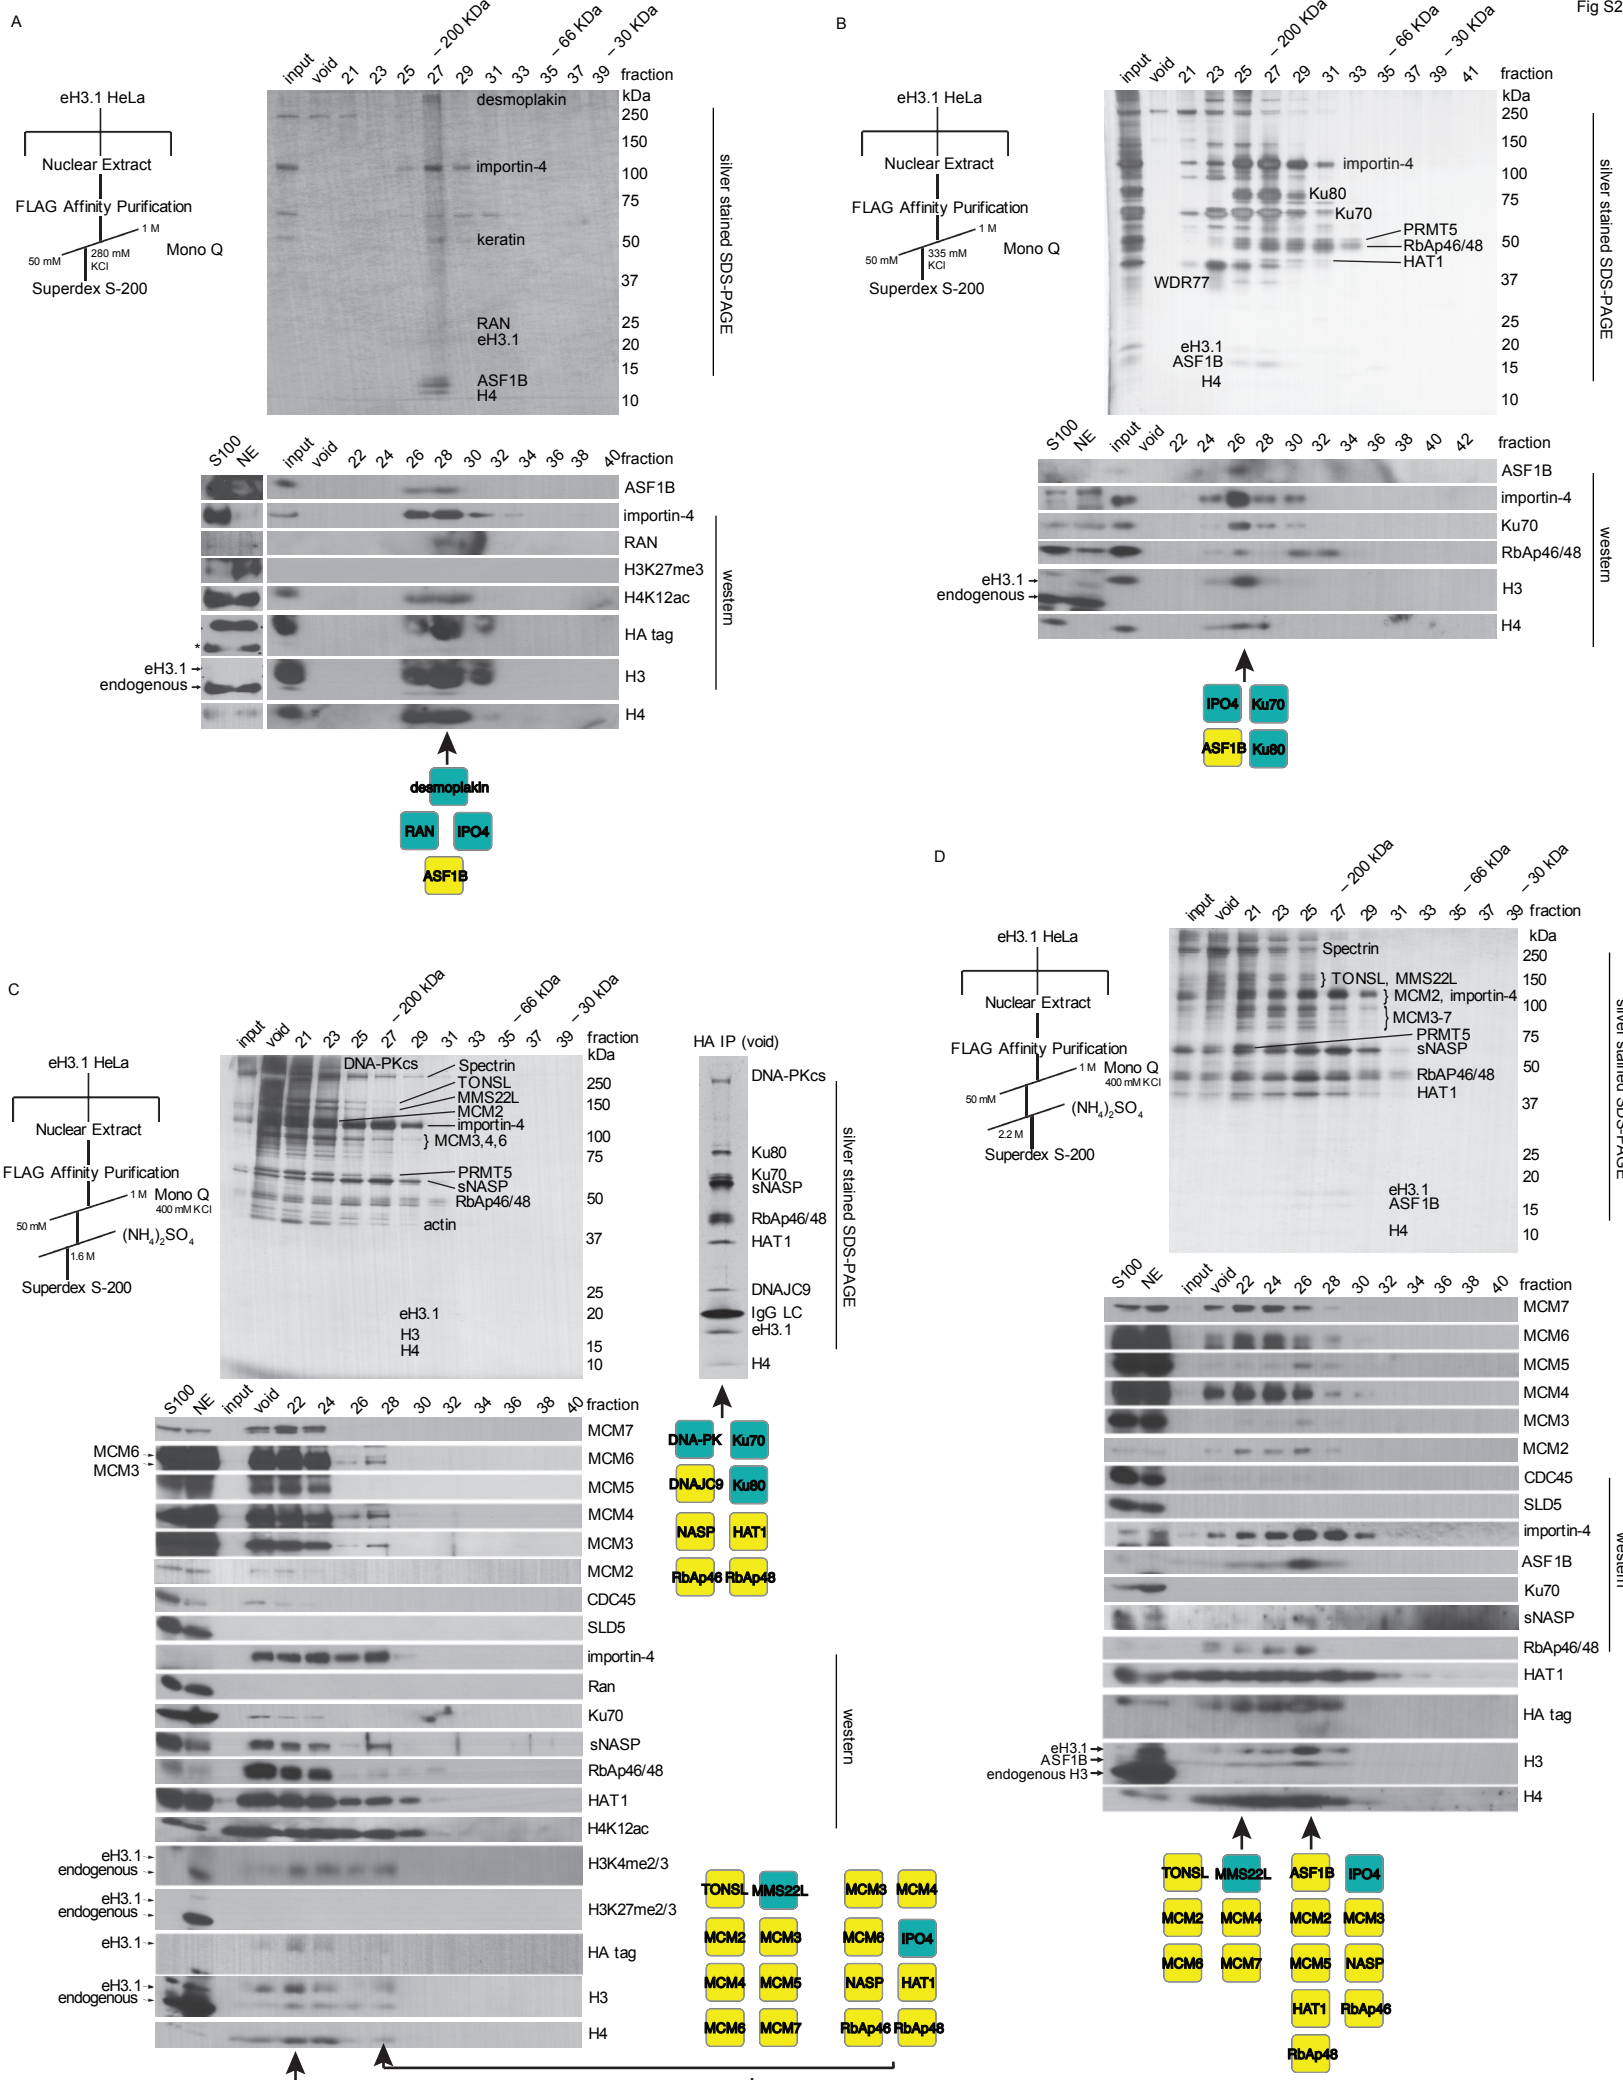

E

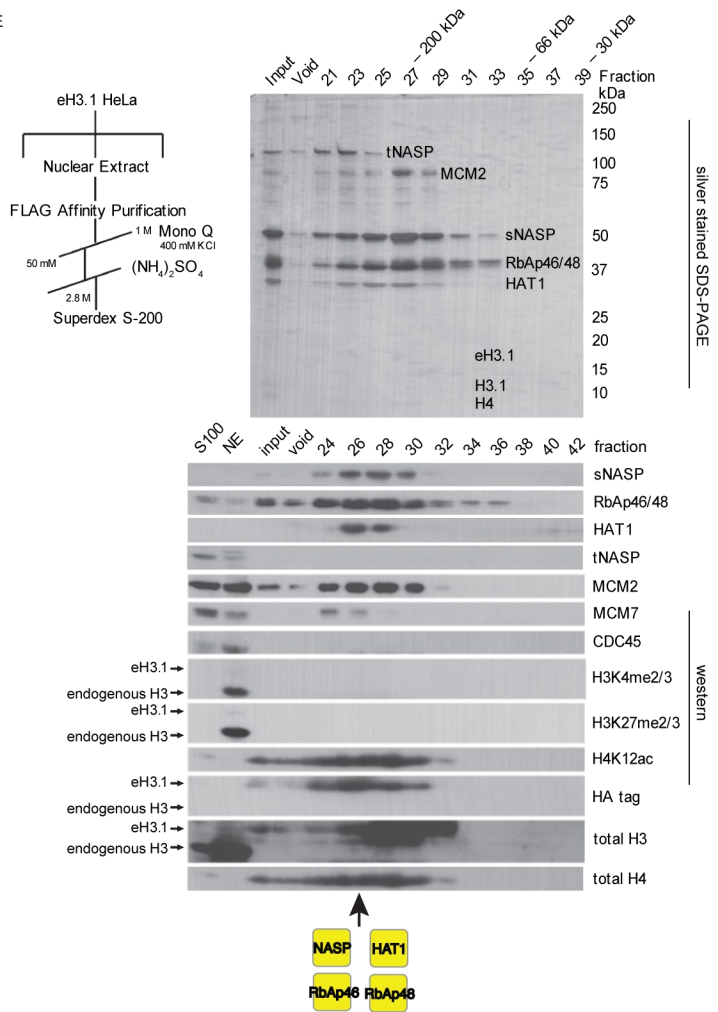

F

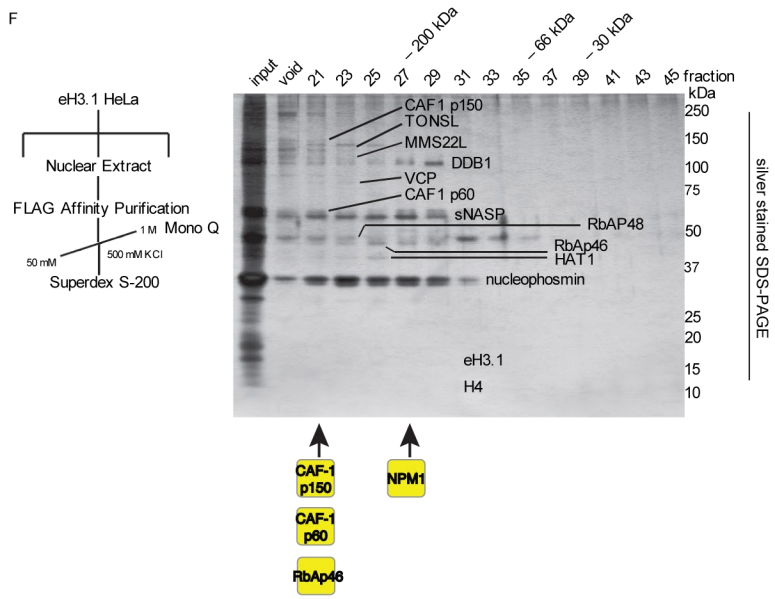

G

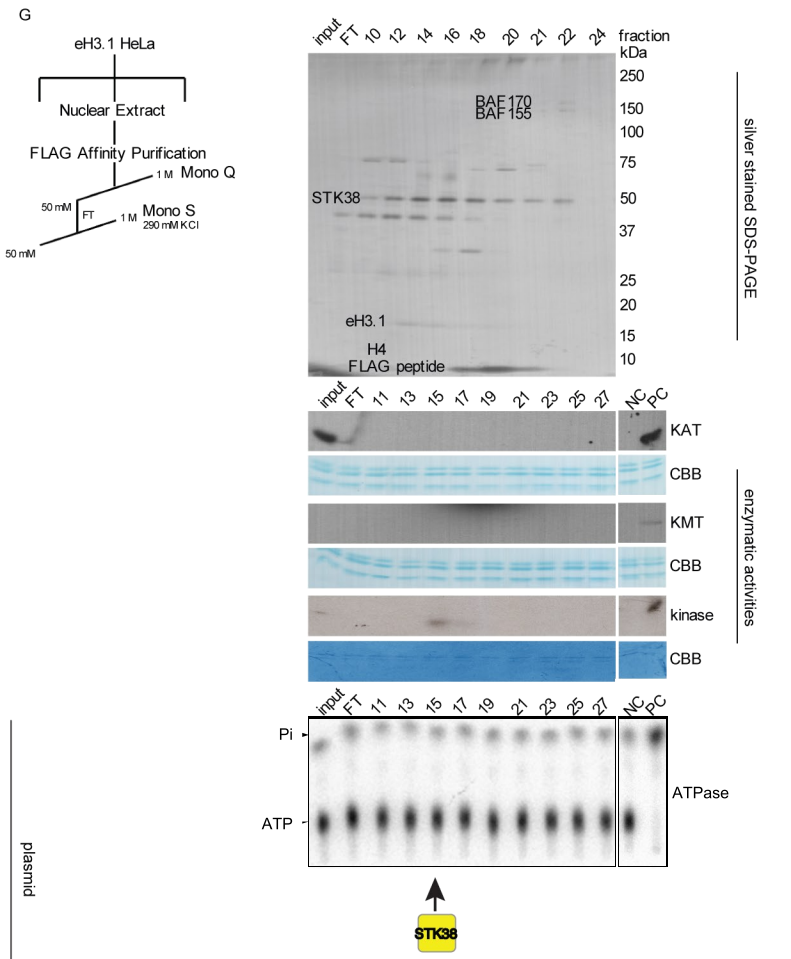

H

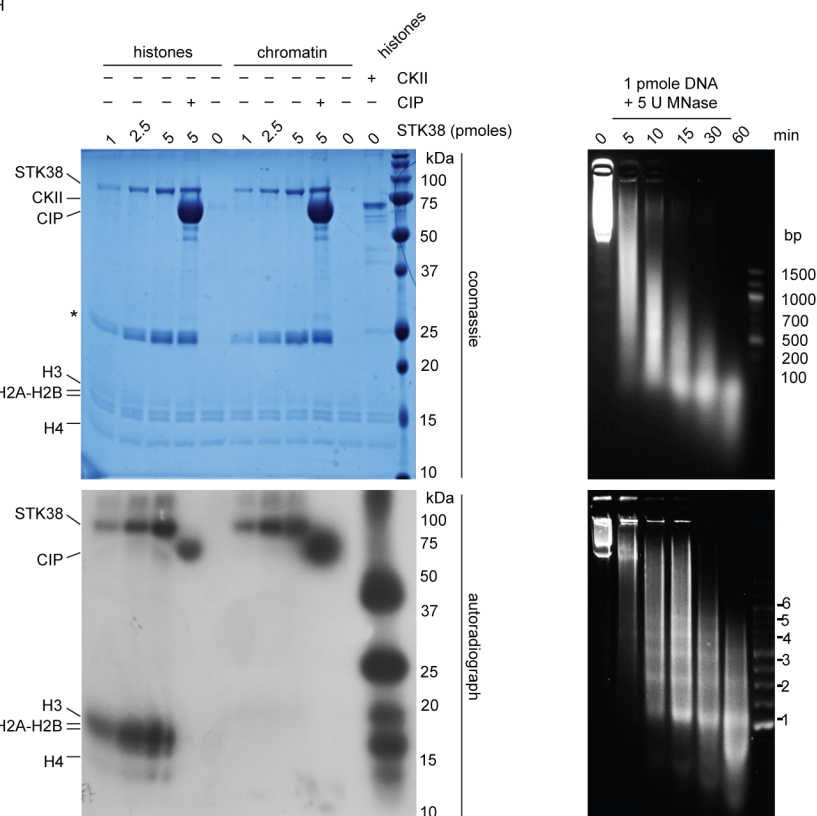

I

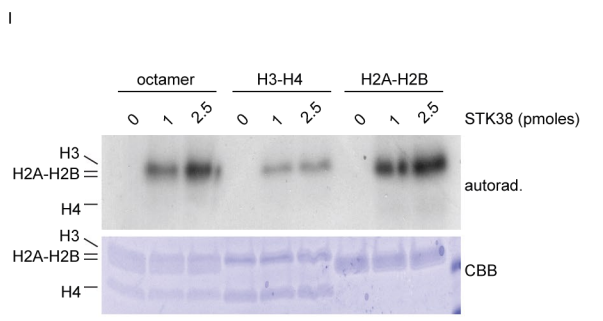

A

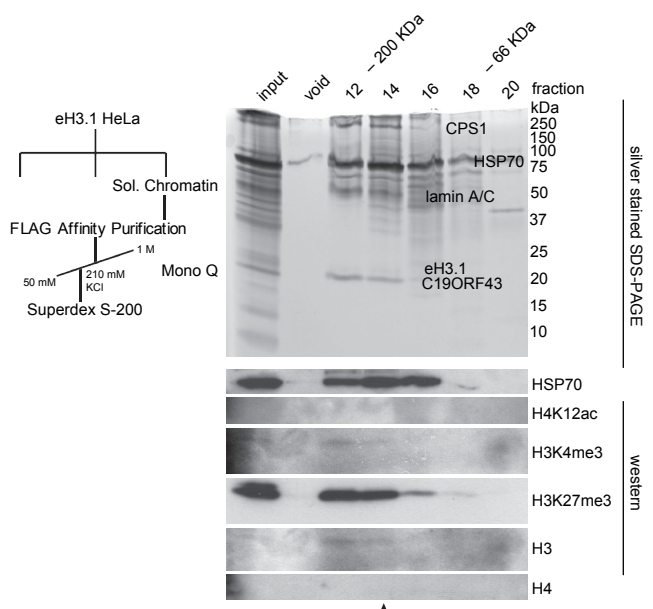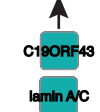

B

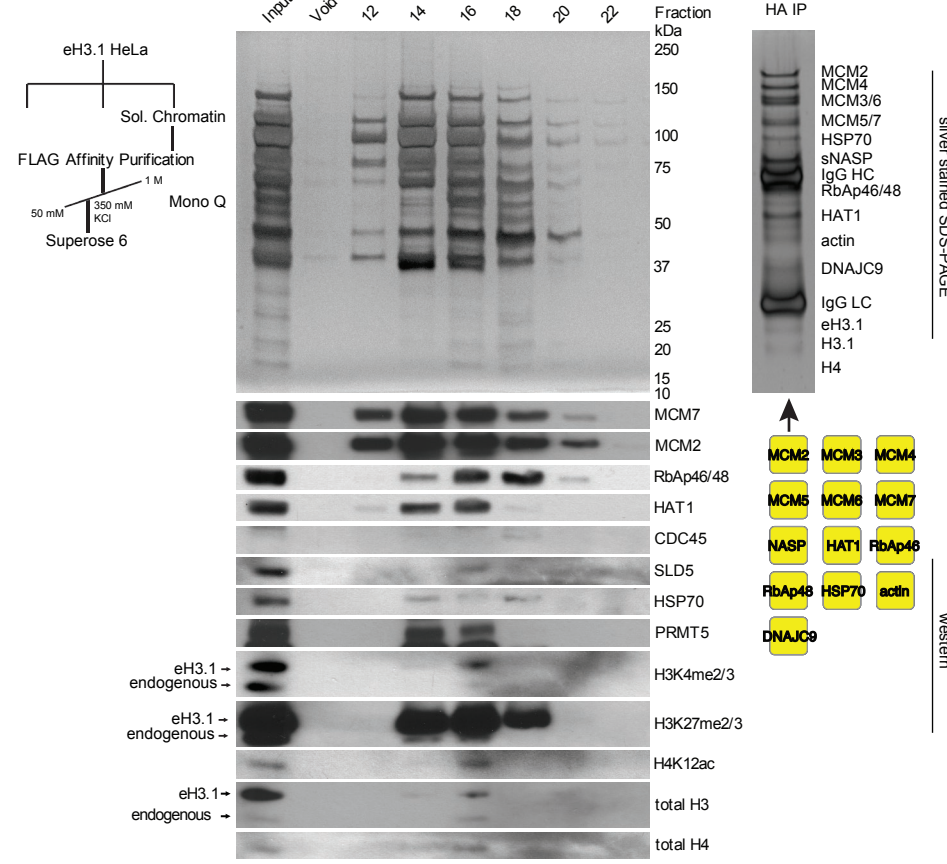

C

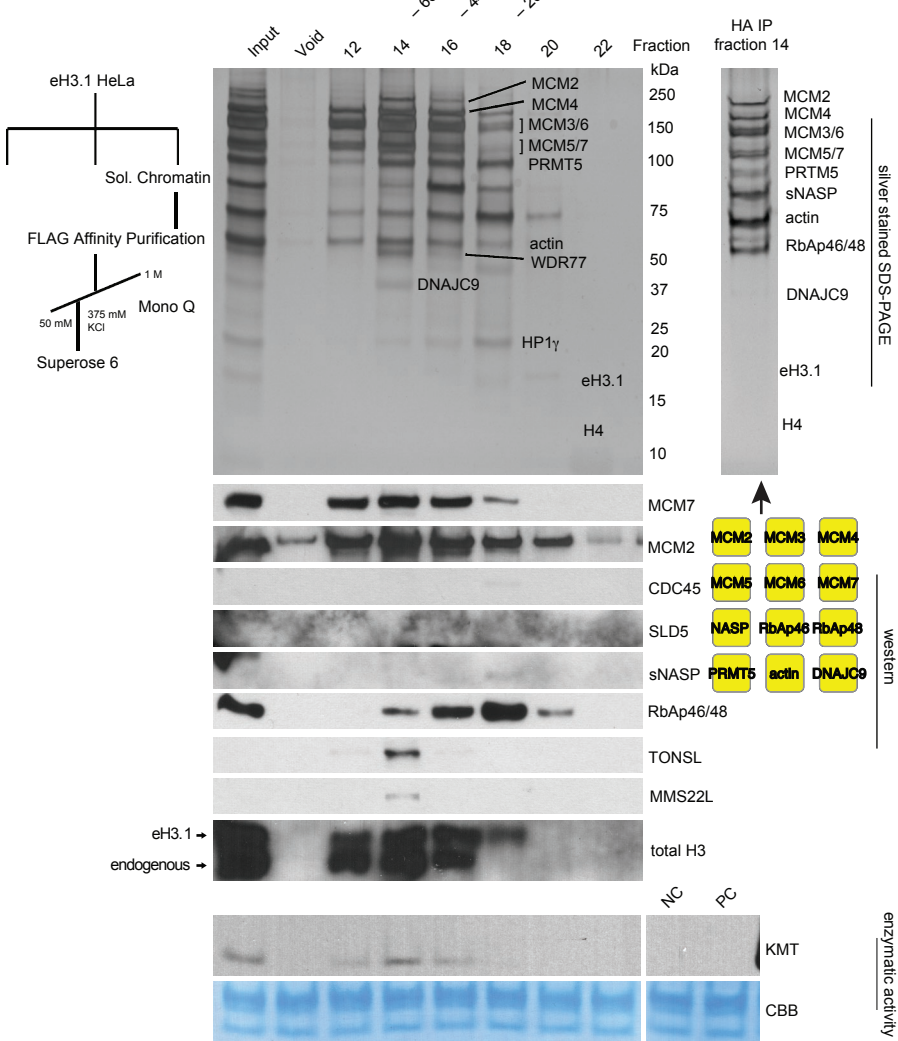

D

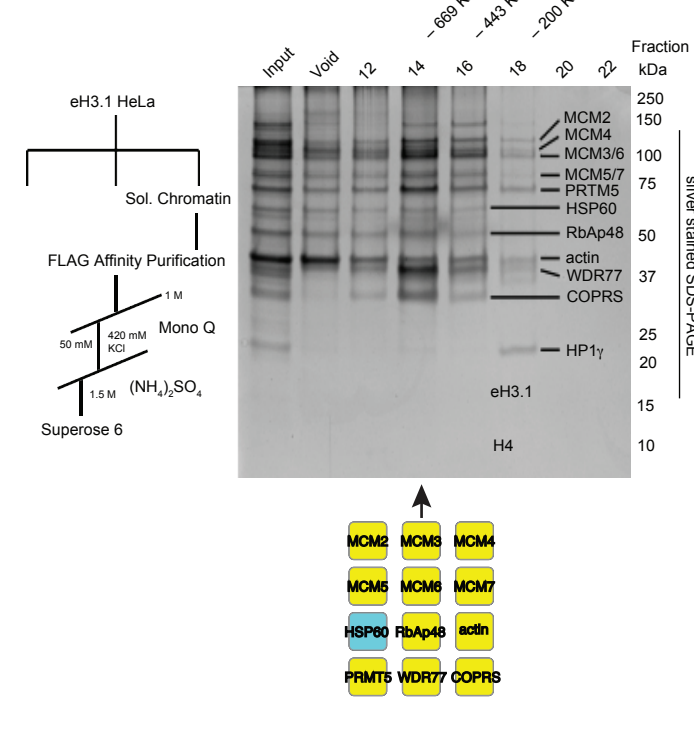

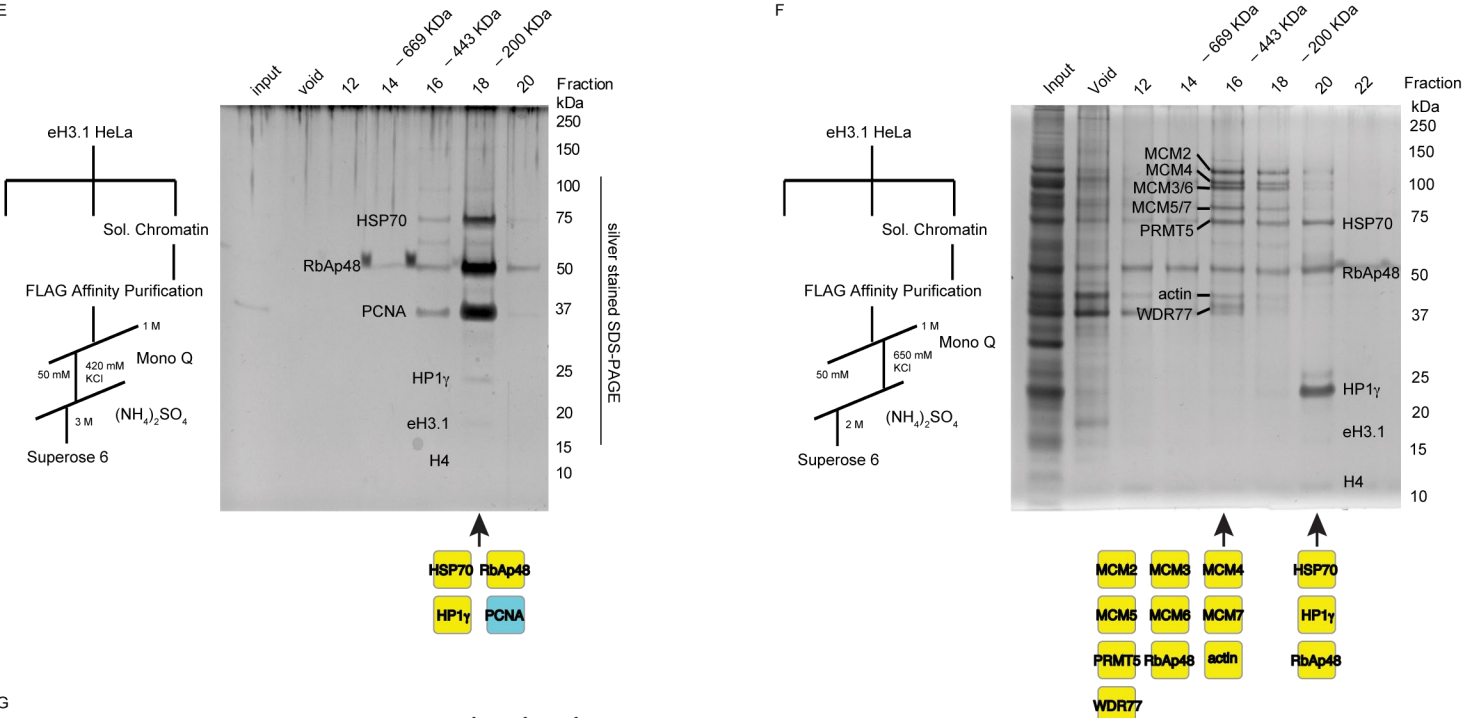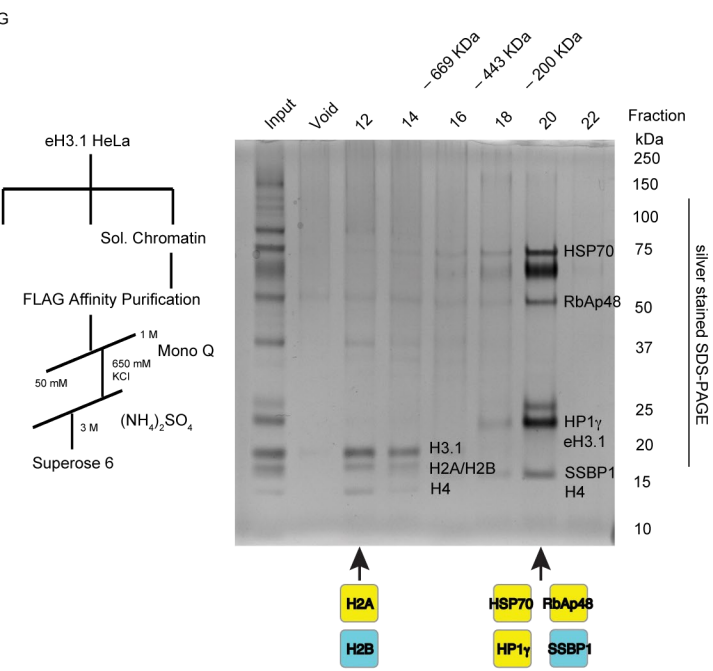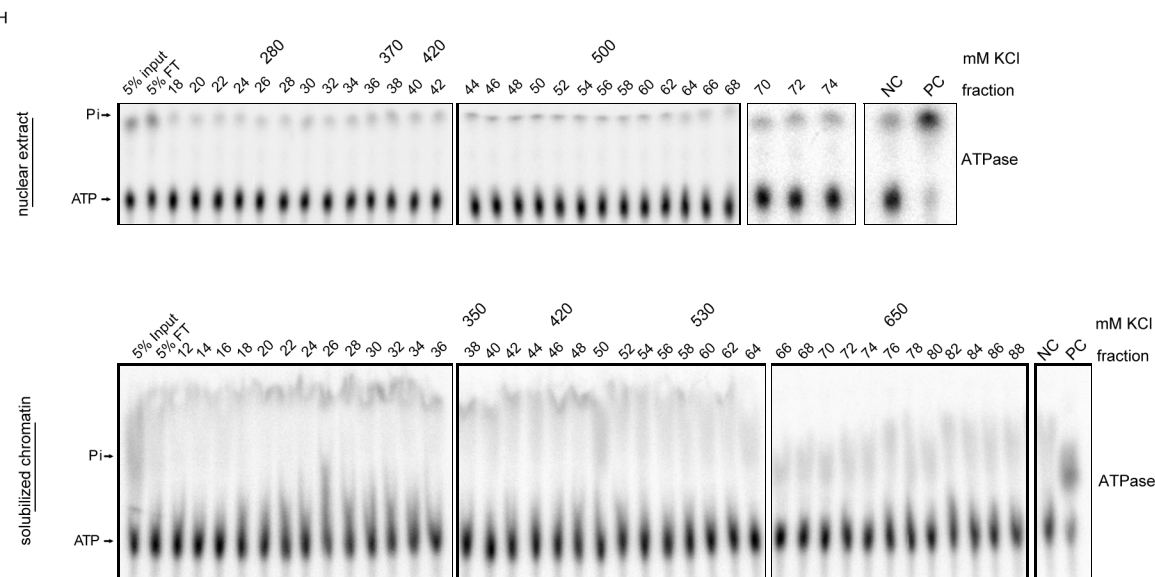

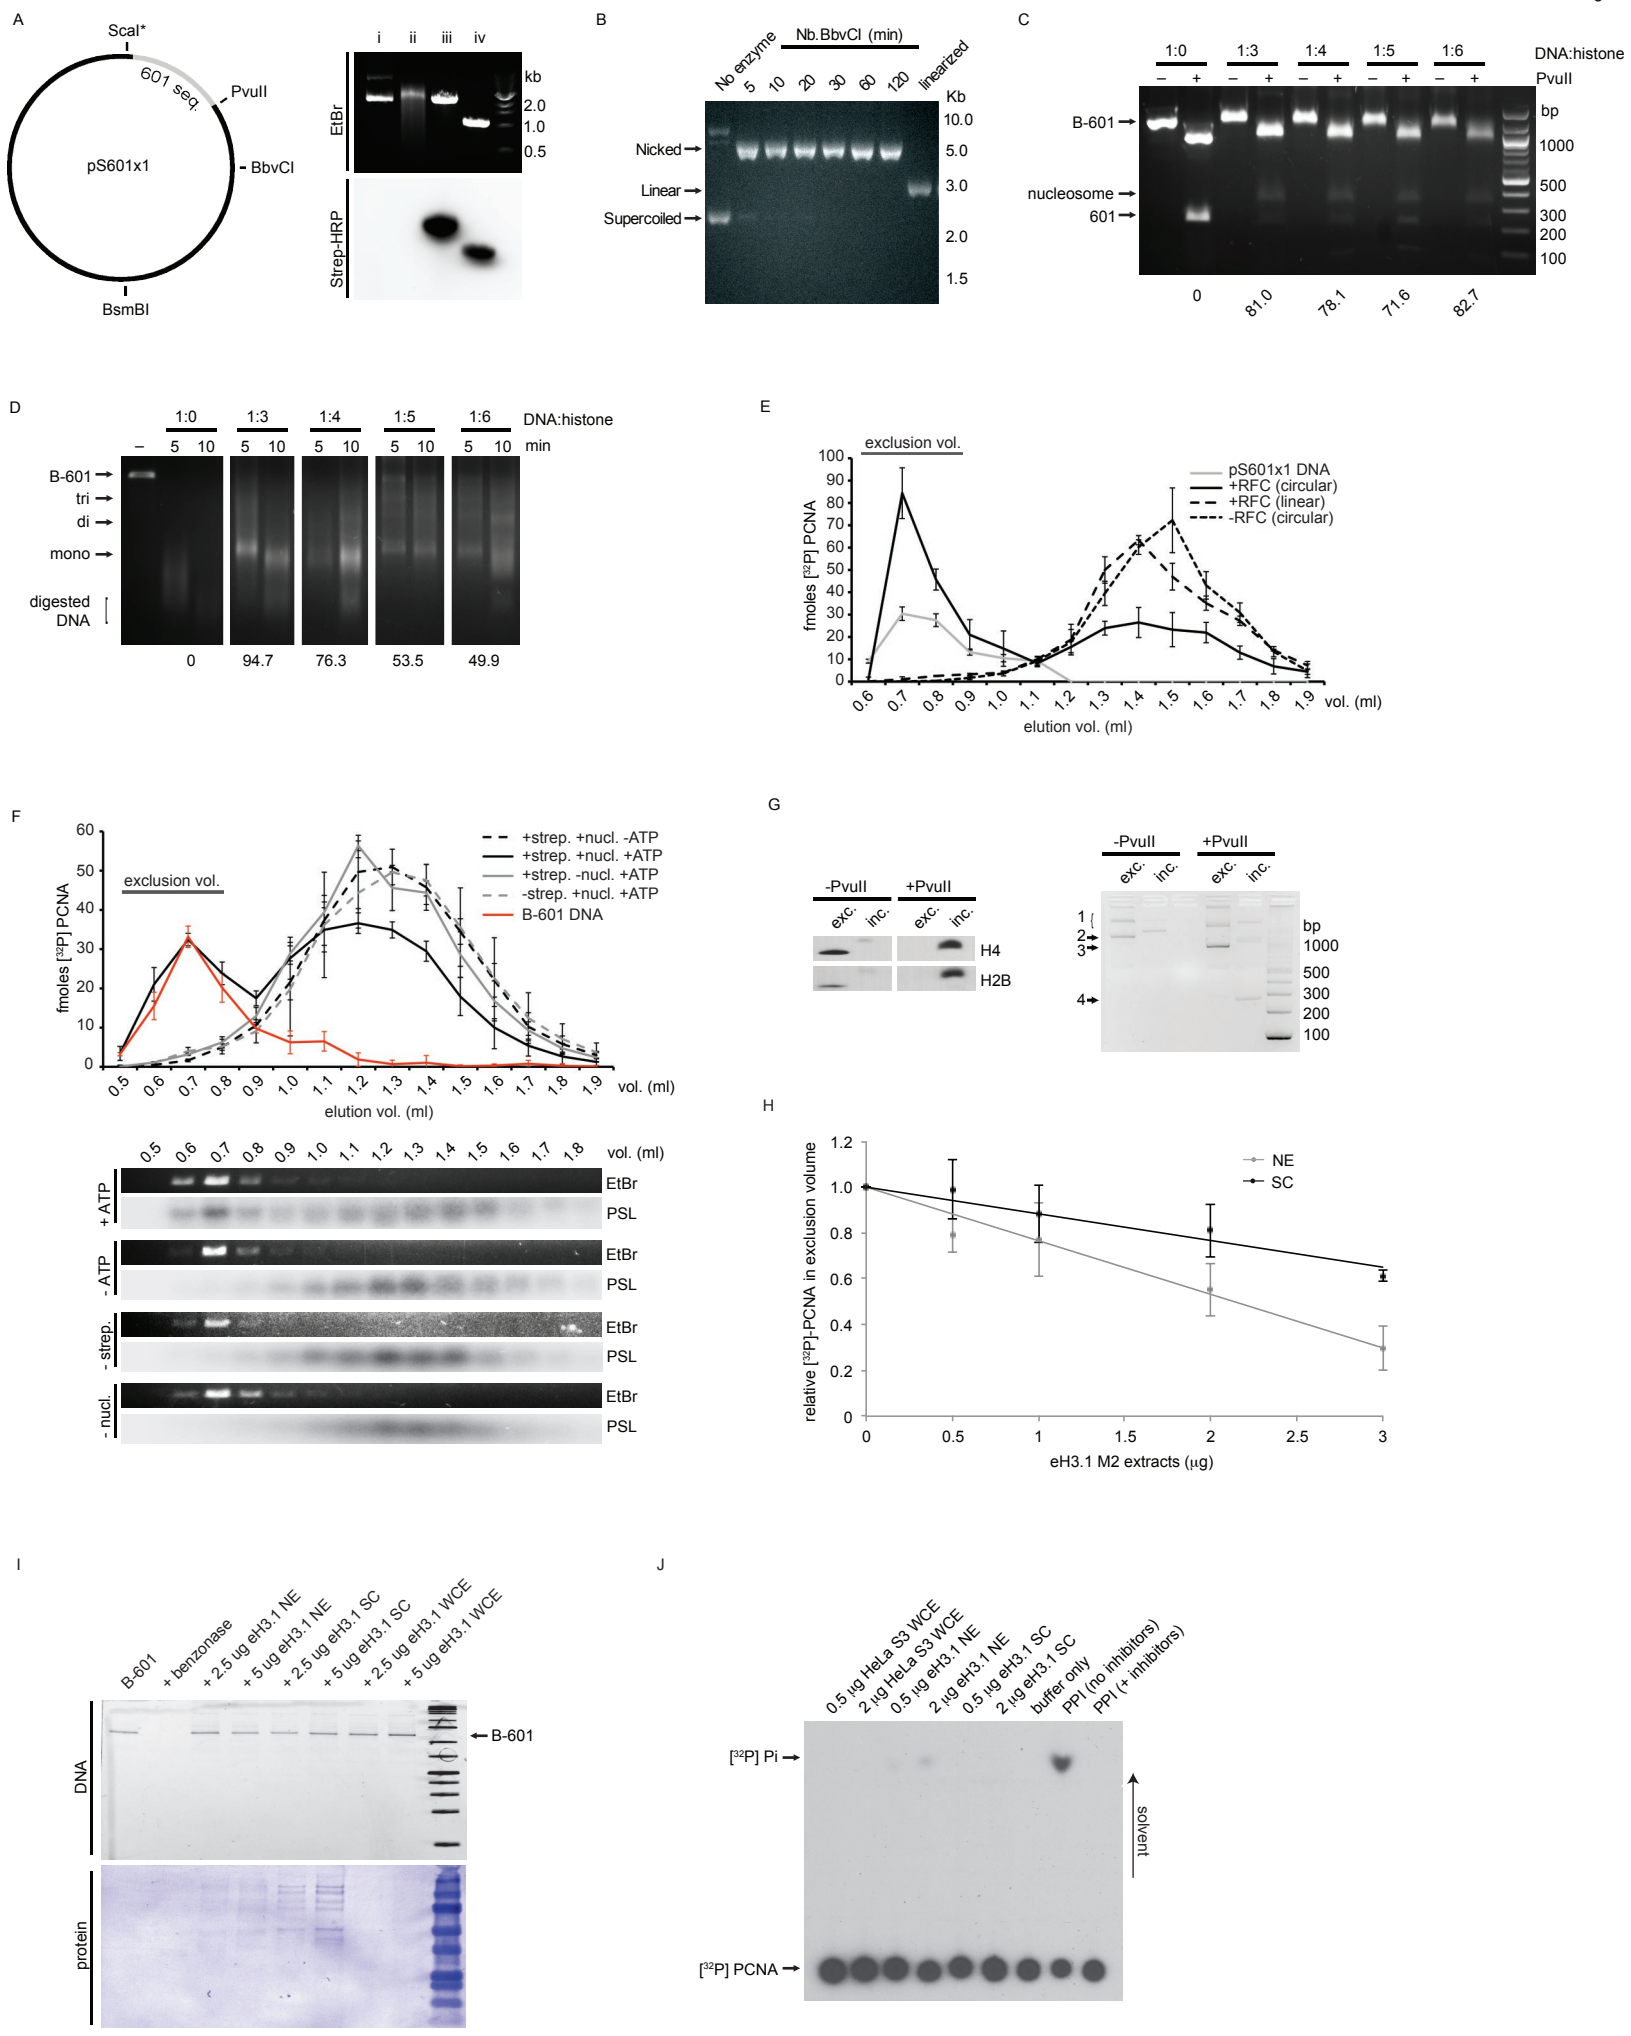

Fig S5

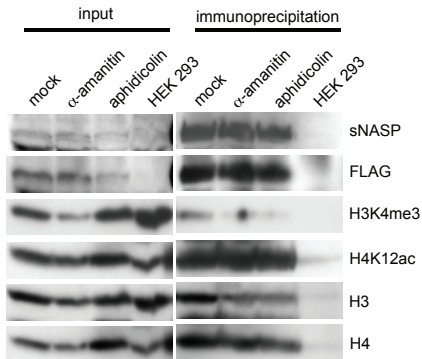

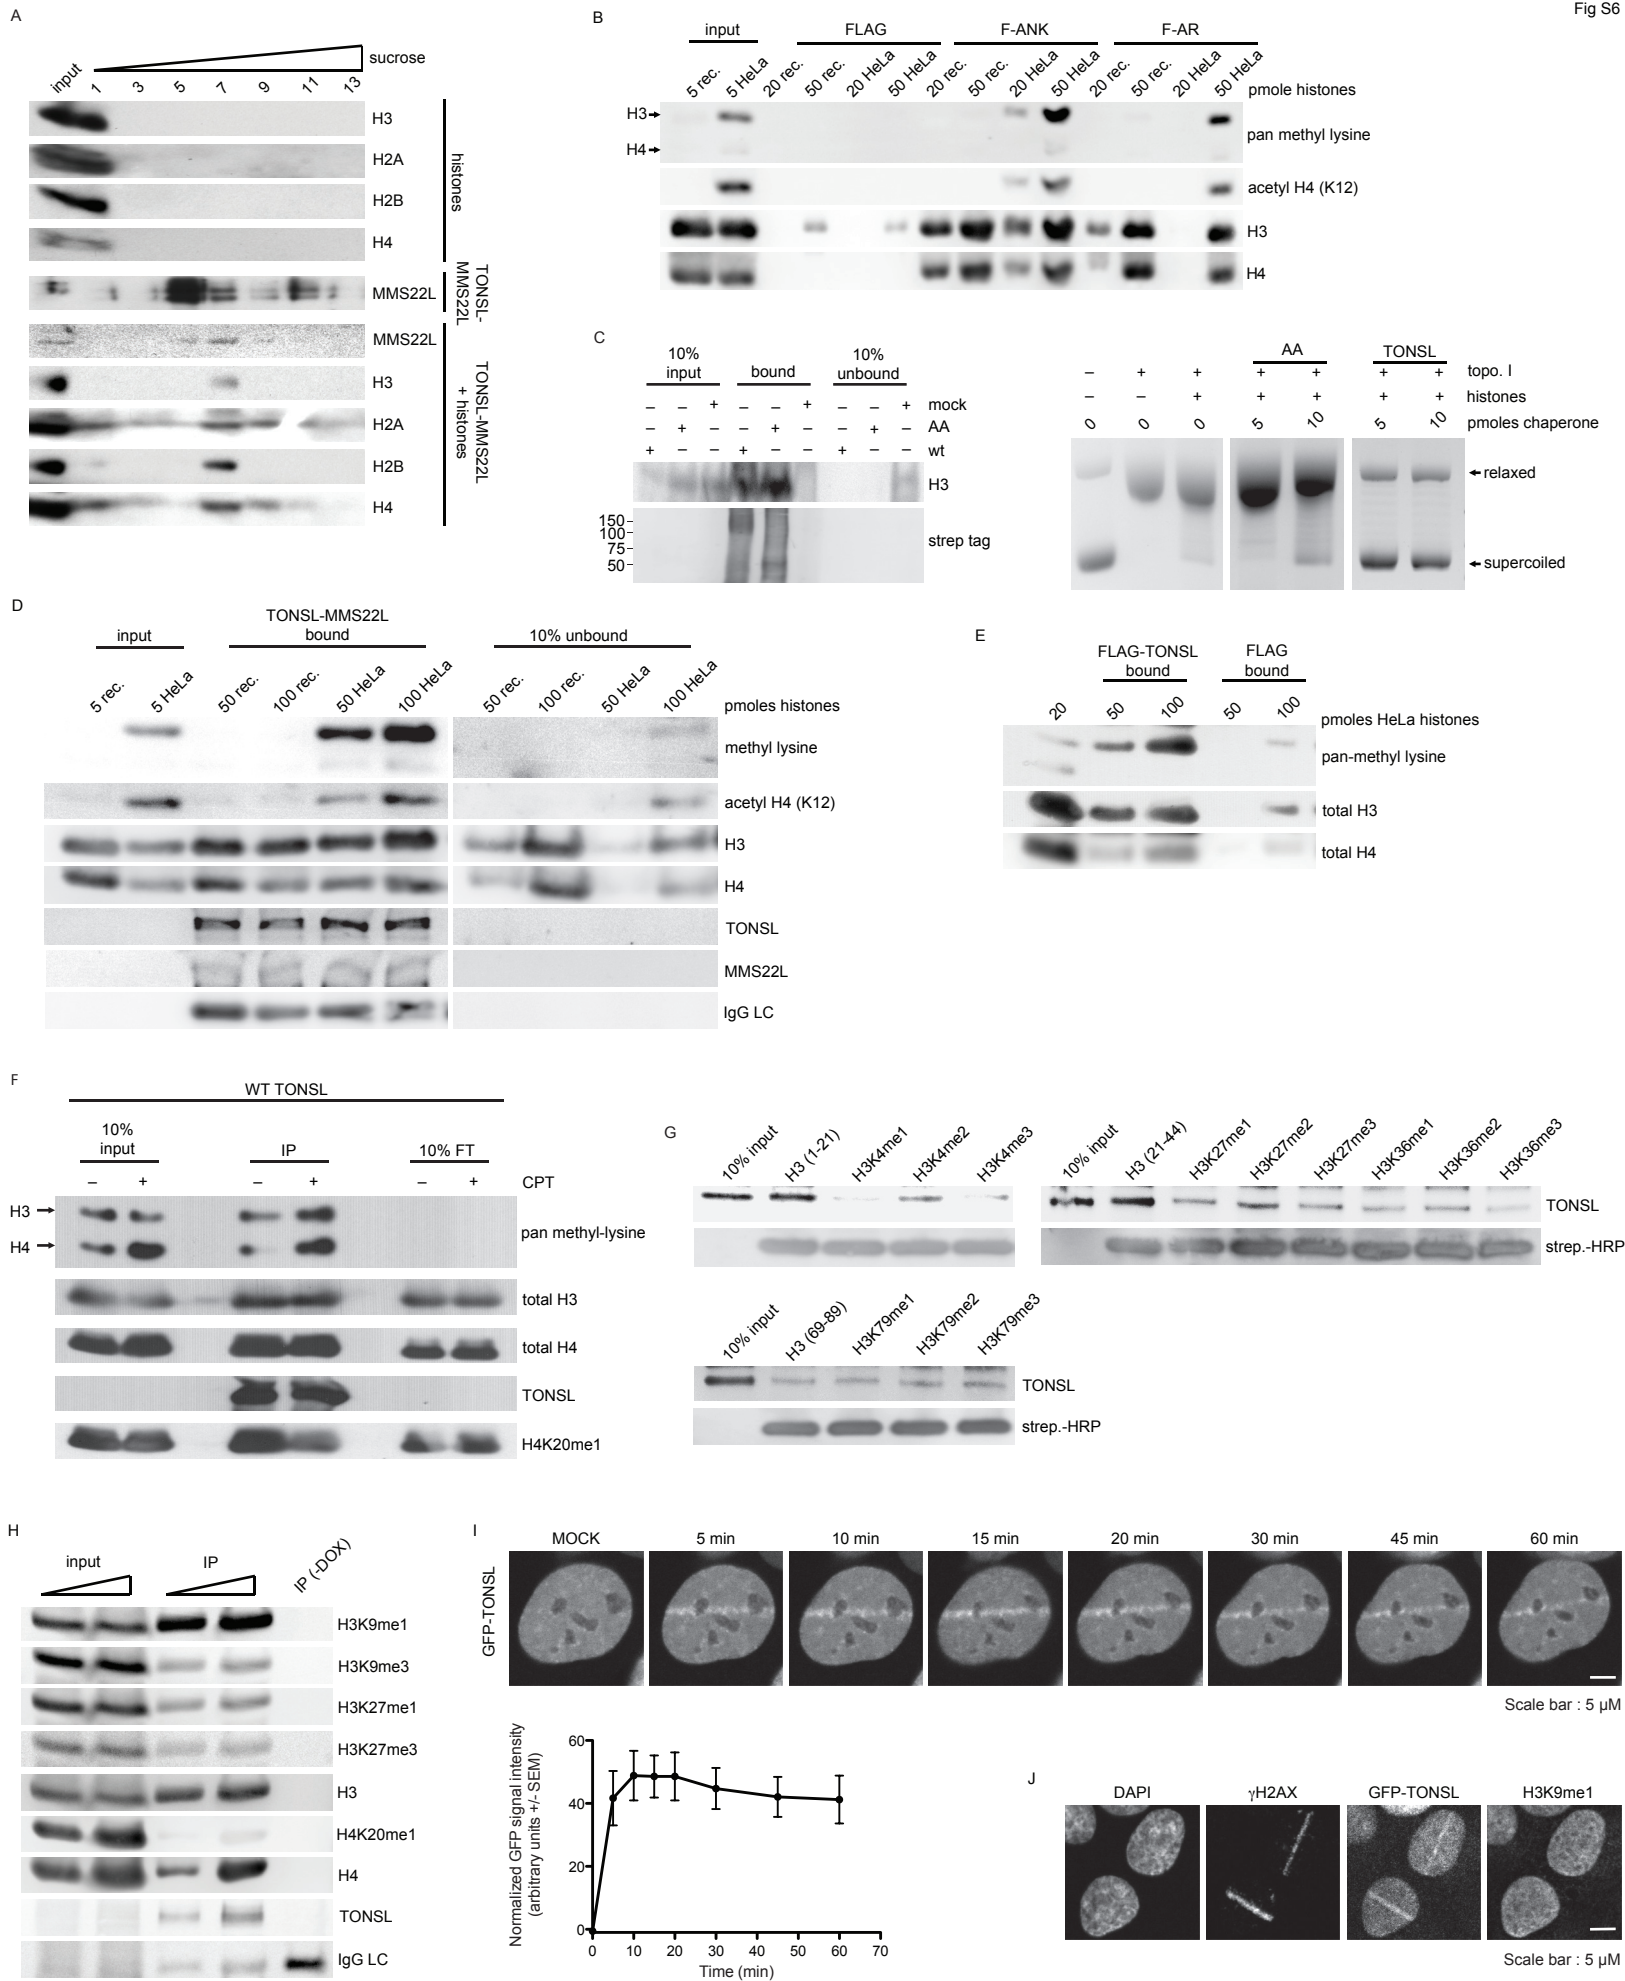



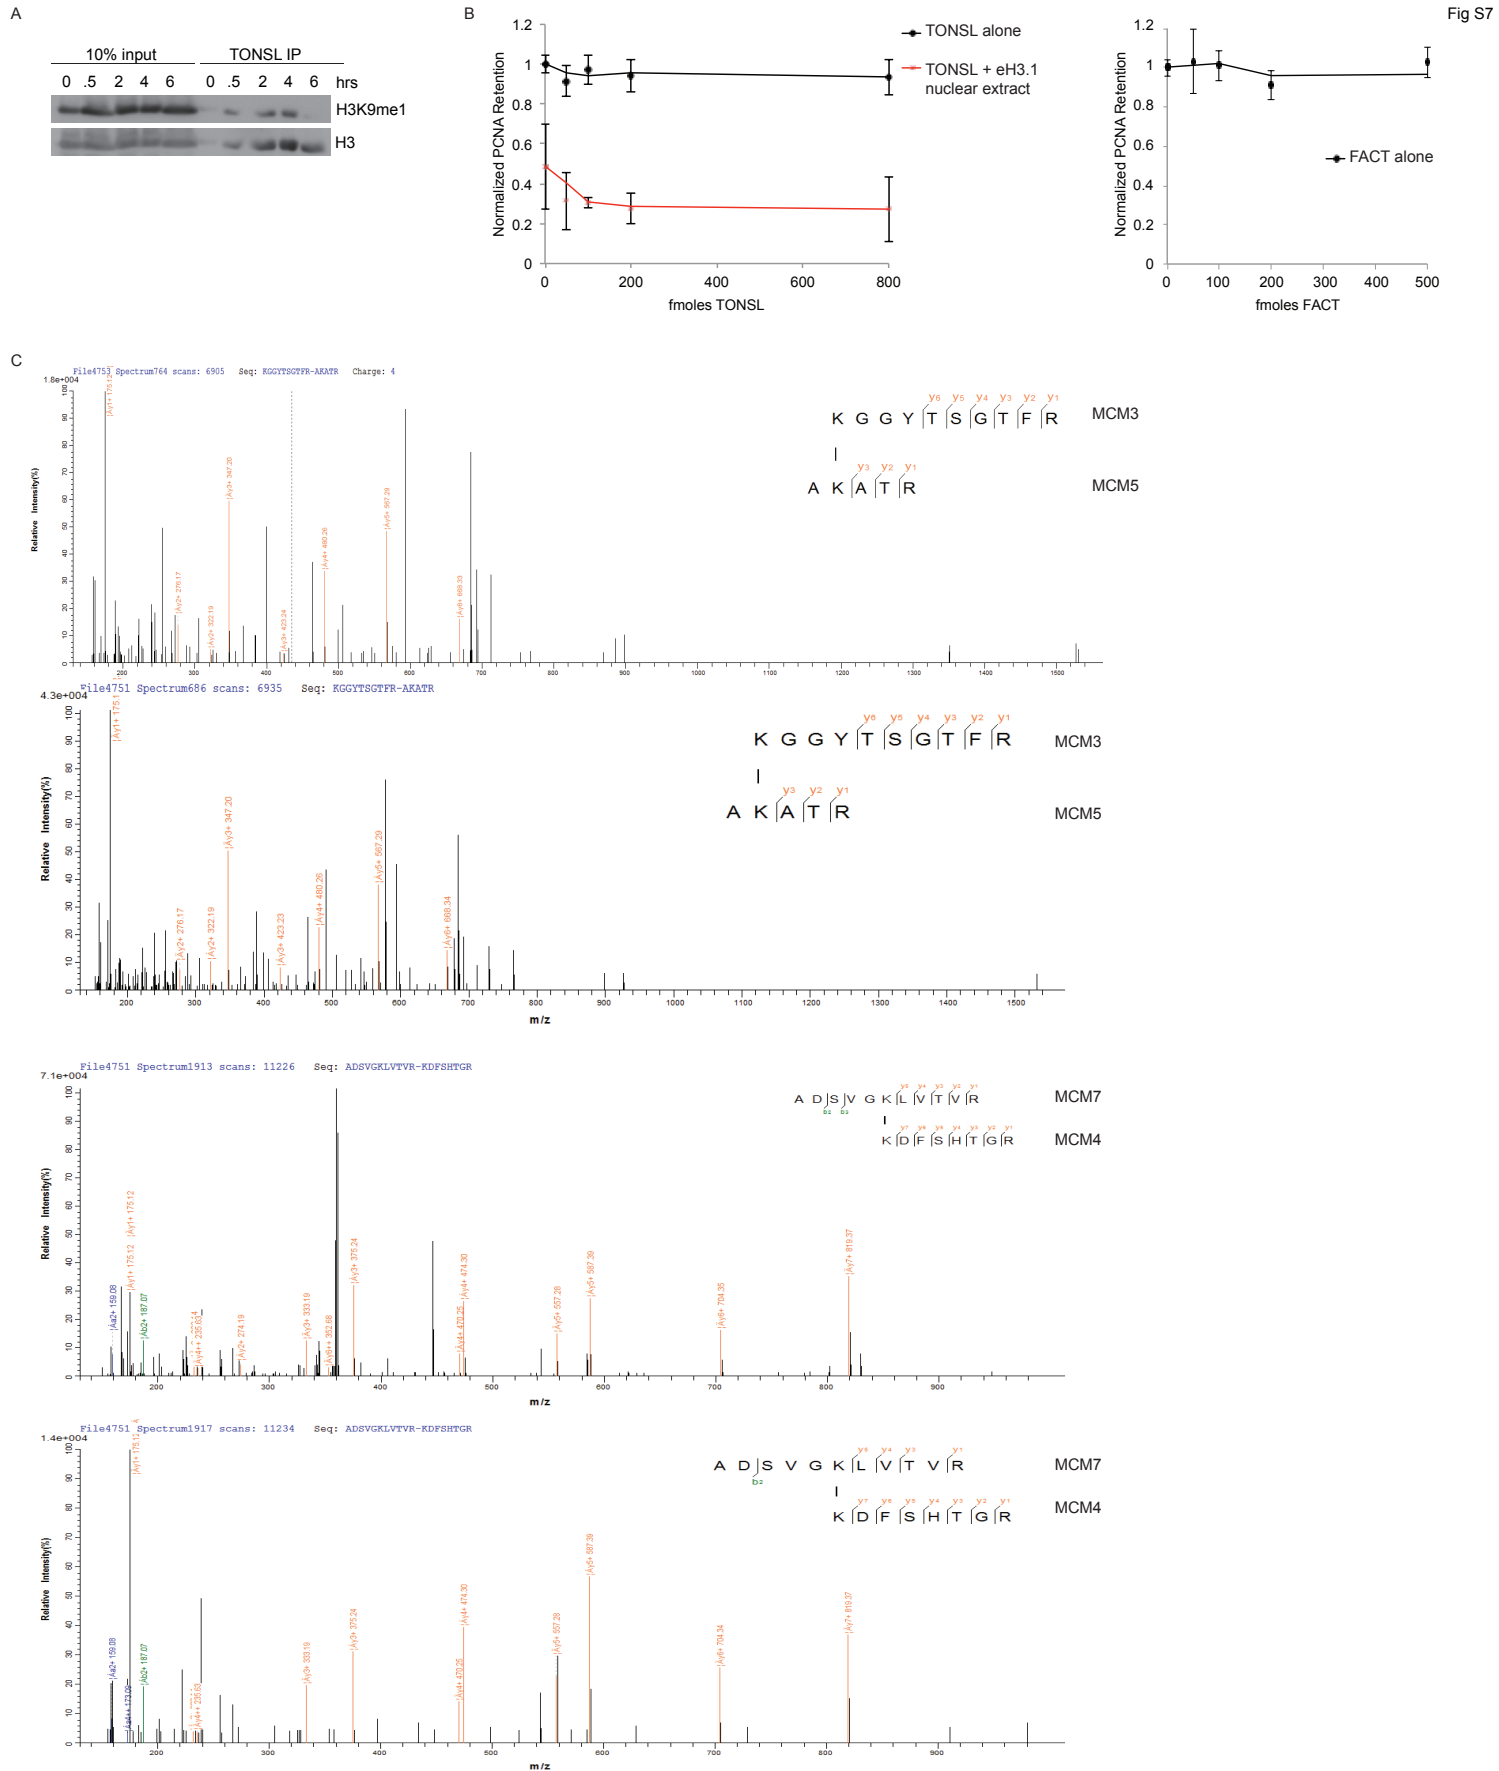

C (contd)

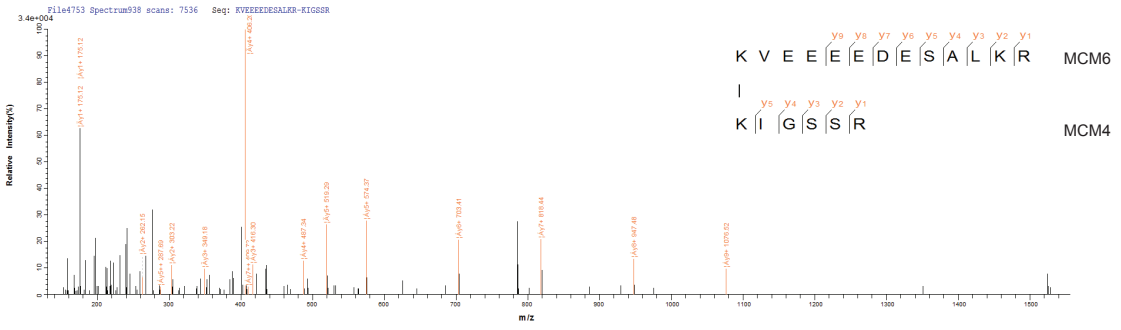

## SUPPLEMENTAL DATA

**Figure S1, Related to Figure 1.** (A) Ontology groups associated with H3.1-associated proteins. (B) Cell cycle distribution of cells used to compare H3.1 interactions between asynchronous and synchronized, replicating cells. (C) Quantitative MS analysis of affinity purified H3.1 material. Each volcano plot represents three independent H3.1 pull-downs comparing asynchronous cell extracts to extracts from replicating cells. The  $x$  axis denotes the intensity of the MS signal whereas a false discovery rate (FDR) adapted t-test is on the  $y$  axis.

**Figure S2, Related to Figure 2.** (A-G) Purification schemes (left panels) and silver and western analyses of soluble H3.1 protein complexes from nuclear extracts (right panels). (G) Figure is composed of separate panels, as extraneous samples are not shown. (H) *In vitro* kinase assay using recombinant STK38 and free or nucleosomal HeLa histones (left panels). Micrococcal nuclease digest of the chromatin template used for the kinase assay compared (right panels). (I) *In vitro* kinase assay comparing the phosphorylation of H3-H4 and H2A-H2B by STK38. NC: negative control, PC: positive control, CBB: Coomassie Brilliant Blue, KAT: lysine acetyltransferase, KMT: lysine methyltransferase.

**Figure S3, Related to Figure 2.** (A-G) Purification schemes (left panels) and silver and western analyses of soluble H3.1 protein complexes from solubilized chromatin (right panels). (H) ATPase activity within eH3.1 fractions. Figures are composed of separate panels as extraneous samples are not shown. Controls were loaded on the last TLC plate.

NC: negative control, PC: positive control, CBB: Coomassie Brilliant Blue, KMT: lysine methyltransferase.

**Figure S4, Related to Figure 3.** Nucleosome disassembly assay. (A-D) Substrate preparation. (A) The pS601x1 plasmid (i) encompassing the DNA substrate is first digested with BsmBI (ii), the overhang is filled in with biotinylated dNTPs (iii), further digested with ScaI and gel purified (iv). (B) The substrate is nicked with Nb.BbvCI alongside a circular plasmid control, to allow for PCNA loading by RFC. (C-D) Careful histone titration allows a single nucleosome to be formed by salt dialysis over the DNA substrate. (C) PvuII digest releasing the nucleosome and relative quantification of assembled histones (percentage). (D) Micrococcal nuclease digest and relative quantification of mononucleosomes (percentage). (E) Radiolabeled PCNA loading by RFC over circular and linear nicked DNA in the absence of histones. (F) Radiolabeled PCNA loading by RFC over linear nicked DNA in the presence or absence of ATP, streptavidin (strep.), or nucleosomal histones (nucl.). (G) Histone and DNA distribution within the inclusion (inc.) and exclusion (exc.) volumes of the gel filtration resin. (1) DNA substrates co-bound by the same streptavidin complex; (2) Full length DNA substrate; (3-4) cleaved DNA substrates. (H) Nucleosome disassembly assay comparing affinity purified eH3.1 material from nuclear extracts or solubilized chromatin. Data represents mean normalized [32P]-PCNA retention +/- SD. (I) B-601 substrate after incubation with either benzonase or the indicated eH3.1 purified extracts at 37 °C for 1 hour. (J) Phosphatase activity with the eH3.1 affinity purified extracts as observed by thin layer chromatography (TLC) resolving free inorganic phosphate (Pi) from radiolabeled

PCNA. EtBr = ethidium bromide; PSL = photostimulated luminescence; WCE = whole cell extract; NE = nuclear extract; SC = solubilized chromatin; PP1 = Protein Phosphatase 1

**Figure S5, related to Figure 4.** FLAG-sNASP immunoprecipitation from mock-treated 293 cells, or cells exposed to either 50 nM  $\alpha$ -amanitin or 1 mM aphidicolin for 24 hrs.

**Figure S6, related to Figure 5.** TONSL binds histone H3 monomethylated on lysine 9. (A) Sucrose density sedimentation of recombinant TONSL-MMS22L with or without HeLa histones. (B) Pull-down assay with immobilized FLAG, FLAG-ankyrin repeats (ANK), and FLAG-acidic region (AR) of TONSL, incubated with recombinant (rec.) or HeLa (modified) histones. (C) Left panel: Binding of HeLa histones to immobilized full-length TONSL or a protein fragment encompassing the acidic region and ankyrin repeats (AA); Right panel: Supercoiling assay comparing the full-length TONSL protein to the AA protein fragment. (D) Pull-down assay as in (B) using immobilized recombinant TONSL-MMS22L. (E) Histones bound to immobilized TONSL (F) Exogenous FLAG-TONSL immunoprecipitated from untreated or camptothecin-treated U2OS cells. (G) Pull-down assay with immobilized histone peptides incubated with recombinant TONSL. (H) Western analysis of histone marks co-immunoprecipitating with TONSL. (I) UV microirradiation of U2OS cells expressing GFP-TONSL. Data represents arbitrary units +/- SEM. (J) Histone marks over UV microirradiated U2OS cells.

**Figure S7, related to Figure 5.** (A) Immunoprecipitated TONSL from U2OS cells exposed to 1  $\mu$  M camptothecin and collected at the indicated time points. (B) Nucleosome disassembly (as in Figure 3). Left panel: Recombinant TONSL was titrated over 100 fmoles of the nucleosomal substrate either by itself (black line) or in the presence of 1.5  $\mu$  g of eH3.1-purified nuclear extracts (red line). Right panel: Recombinant FACT was titrated over 100 fmoles of the nucleosomal template by itself. Data represents mean normalized [32P]-PCNA retention  $\pm$  SD. (C) Representative MS/MS HCD spectrum of the (M + H)<sup>+</sup>4 ion of cross-linked peptides within the TONSL-MCM2-7 complex, acquired after reduction and alkylation on the QExactive with 70,000 resolution (@ 400 m/z). N-terminal fragment ions (*b*) are indicated in blue and C-terminal fragment ions (*y*) are indicated in green and red. Doubly charged ions are indicated with +2. The mass accuracy for precursor ion is better than 1 ppm and mass accuracy of all the fragment ions is better than 10 ppm. (D) Binding of purified recombinant MCM subunits to immobilized TONSL. Asterisk denotes degraded MCM2 protein.

**Table S1, Related to Figure 1.** Quantitative mass spectrometry of eH3.1-associated polypeptides. Raw data can be found through the following link:

<https://chorusproject.org/anonymous/download/experiment/a2600c95c5944e79aa6fe2d541a864fe>

**Table S2, Related to Figure 2.** Polypeptides co-purifying with soluble H3.1. Histone species solely acetylated on H4K5 and K12 (with or without concomitant H3K9me1) are considered as newly-synthesized, whereas histones containing an assortment of any additional modifications, such as H3K27me2/3 or H3K4me2/3 are considered evicted, pre-existing, nuclear histones. Complexes containing both endogenous and exogenous H3 are considered to be in (H3-H4)<sub>2</sub> tetrameric forms.

**Table S3, Related to Figure 5.** MS analysis of polypeptides co-purifying with immunoprecipitated TONSL from DSS-crosslinked cells.

Table S2

| figure | purification scheme                  | proteins co-eluting with eH3.1                              | theoretical MW (kDa)                                                                       | approx. MW (kDa) | endo. H3 | H4K12 ac | H3K4/27 me3 |
|--------|--------------------------------------|-------------------------------------------------------------|--------------------------------------------------------------------------------------------|------------------|----------|----------|-------------|
| S2A    | NE / M2 / Q(0.28) / GF               | desmoplakin, importin-4, ASF1B, RAN, H4                     | 541.1<br>• without desmoplakin: 209.3                                                      | 200              | no       | yes      | no          |
| S2B    | NE / M2 / Q(0.34) / GF               | importin-4, Ku80, Ku70, ASF1B, H4                           | 317.5                                                                                      | 275              | no       | n.d.     | n.d.        |
| S2C    | NE / M2 / Q(0.4) / AS(1.6) / GF / HA | DNA-PKcs, Ku80, Ku70, DNAJC9, sNASP, HAT1, RbAp46/48, H4    | 824.4                                                                                      | >700             | no       | n.d.     | n.d.        |
| S2C    | NE / M2 / Q(0.4) / AS(1.6) / GF      | MCM2-7/TONSL/MMS22L, H4                                     | 839.2                                                                                      | 700              | yes      | yes      | yes         |
| S2C    | NE / M2 / Q(0.4) / AS(1.6) / GF      | MCM3, 4, 6, importin-4, sNASP, HAT1, RbAp46/48, H4          | • MCM3, 4, 6: 280.4<br>• sNASP, HAT1, RbAp46, H3, H4: 172.9                                | 200              | yes      | yes      | yes         |
| S2D    | NE / M2 / Q(0.4) / AS(2.2) / GF      | MCM2, 4, 6, 7, TONSL, MMS22L H4                             | 692.7                                                                                      | 700              | no       | n.d.     | n.d.        |
| S2D    | NE / M2 / Q(0.4) / AS(2.2) / GF      | MCM2, 3, 5, importin-4, ASF1B, sNASP, HAT1, RbAp46/48, H4   | • MCM2, 3, 5, ASF1B, H3, H4: 324.4<br>• (sNASP, HAT1, RbAp46, H3, H4) <sub>2</sub> : 345.8 | 330              | no       | n.d.     | n.d.        |
| S2E    | NE / M2 / Q(0.4) / AS(2.8) / GF      | sNASP, HAT1, RbAp46/48, H4                                  | 172.9<br>• (sNASP, HAT1, RbAp46, H3, H4) <sub>2</sub> : 345.8                              | 275              | yes      | yes      | no          |
| 4A     | NE / M2 / Q(0.4) / AS(3.4) / GF      | sNASP, HAT1, RbAp46/48, H4                                  | 172.9<br>• (sNASP, HAT1, RbAp46, H3, H4) <sub>2</sub> : 345.8                              | 275              | no       | yes      | yes         |
| S2F    | NE / M2 / Q(0.5) / GF                | CAF-1 p150, CAF-1 p60, RbAp48                               | 216.2                                                                                      | 700              |          |          |             |
| S2F    | NE / M2 / Q(0.5) / GF                | Nucleophosmin, H4                                           | 59.3                                                                                       | 450 & 200        | n.d.     | n.d.     | n.d.        |
| S2G    | NE / M2 / S(0.29)                    | STK38, H4                                                   | 81                                                                                         | n.d.             | n.d.     | n.d.     | n.d.        |
| S2H    | SNP / M2 / Q(0.21) / GF              | lamin A/C, C19ORF43, H4                                     | 100.2                                                                                      | 225              | no       | no       | yes         |
| S2I    | SNP / M2 / Q(350) / GF / HA          | MCM2-7, HSP70 protein 9, sNASP, RbAp46/48, HAT1, DNAJC9, H4 | 822.4<br>• MCM2-7, H3, H4: 572.7                                                           | 600              | yes      | yes      | yes         |
| S2J    | SNP / M2 / Q(375) / GF / HA          | MCM2-7, PRMT5, sNASP, RbAp46/48, DNAJC9, actin, H4          | 905.1<br>• MCM2-7, actin, DNAJC9, H3, H4: 688.1                                            | 670              | yes      | n.d.     | n.d.        |
| S2K    | SNP / M2 / Q(420) / AS(1.5) / GF     | MCM2-7, HSP60, RbAp48, actin, PRMT5, WDR77, COPRS, H4       | 846.8<br>• MCM2-7, actin, HSP60, RbAp48, H3, H4: 723.3                                     | 670              | n.d.     | n.d.     | n.d.        |
| S2L    | SNP / M2 / Q(420) / AS(3) / GF       | HSP70, RbAp48, PCNA, HP1 $\gamma$ , H4                      | 196.5                                                                                      | 200              | n.d.     | n.d.     | n.d.        |
| S2M    | SNP / M2 / Q(650) / AS(2) / GF       | MCM2-7, RbAp48, actin, PRMT5, WDR77, H4                     | 765.6<br>• MCM2-7, actin, RbAp48, H3, H4: 662.2                                            | 450              | n.d.     | n.d.     | n.d.        |
| S2M    | SNP / M2 / Q(650) / AS(2) / GF       | HSP70, RbAp48, HP1 $\gamma$ , H4                            | 167.7                                                                                      | 150              | n.d.     | n.d.     | n.d.        |
| S2N    | SNP / M2 / Q(650) / AS(3) / GF       | HSP70, RbAp48, HP1 $\gamma$ , SSBP1, H4                     | 184.9                                                                                      | 150              | n.d.     | n.d.     | n.d.        |
| S2N    | SNP / M2 / Q(650) / AS(3) / GF       | H3, H2A, H2B, H4                                            |                                                                                            | >700             | n.d.     | n.d.     | n.d.        |

NE: nuclear extract (nucleosol)  
M2: FLAG affinity purification  
S(x): cation exchange [KCl] (M)  
GF: gel filtration  
n.d.: not determined

SNP: solubilized nuclear pellet (chromatin)  
Q(x): anion exchange [KCl] (M)  
AS(x): salting out [(NH<sub>4</sub>)<sub>2</sub>SO<sub>4</sub>] (M)  
HA: hemagglutinin affinity purification



## **EXTENDED EXPERIMENTAL PROCEDURES**

### **Constructs, Antibodies, Cell lines and Tissue Culture**

The FLAG-HA H3.1 (eH3.1) HeLa S3 lineage, FLAG-ASF1B and FLAG-sNASP 293 clones, as well as the inducible FLAG-TONSL U2OS cells were cultured as previously described (Campos et al., 2010; O'Donnell et al., 2010; Tagami et al., 2004). Thymidine-based cell synchronization, laser irradiation and immunofluorescence were performed as before (Campos et al., 2010; O'Donnell et al., 2010). TONSL (GenBank accession number BC008782.2) and MMS22L (NM\_199467.2) cDNAs were obtained from OpenBiosystems and subcloned into pFASTBAC vectors (Invitrogen). Baculoviruses were generated using the Bac-to-Bac system (Invitrogen) as directed by the manufacturer. TONSL was further subcloned into pET28 (EMD Biosciences).

Thymidine,  $\alpha$ -amanitin, and aphidicolin were purchased from Sigma-Aldrich. The following antibodies and reagents were used in addition to the ones that had been previously described (Campos et al., 2010; O'Donnell et al., 2010): CDC45 (Abcam), H2A (Cell Signaling), H2B (Millipore), H3K9me1 (Abcam), H3K27me1 (Millipore), H3K27me3 (Cell Signaling), H4me3 (Upstate), H4K20me1 (Abcam), Ku70 (Abcam), MCM2 (Bethyl), MCM3 (Bethyl), MCM4 (Bethyl), MCM5 (Pierce), MCM6 (Bethyl), MMS22L (SCBT), nucleophosmin (Abcam), pan-methyl lysine (Abcam), PRMT5 (Abcam), TONSL (Pierce), RAN (SCBT), SLD5 (Proteintech), streptavidin-HRP (Jackson ImmunoResearch). Restriction enzymes were obtained from NEB.

### **Biochemical fractionation**

The eH3.1 chromatin pellet from a ~200 L culture was resuspended and dounce homogenized with a loose pestle in 50 ml of buffer E (50 mM Tris, pH7.6, 25% glycerol (v/v), 5 mM MgCl<sub>2</sub>, 0.5 mM EDTA, 5 mM DTT, 0.2 mM PMSF). The soluble material was then separated from insoluble chromatin and lamina by adding ammonium sulfate to 300 mM (final concentration). Chromatin was then sonicated on ice and centrifuged at 185,000 x g for 1 hour to separate the solubilized protein complexes from the insoluble chromatin and lamina. The supernatant was collected, diluted two folds in buffer E, and two volumes of saturated ammonium sulfate solution slowly added to precipitate the protein complexes. Precipitates were pelleted by centrifugation (35,000 x g for 30 min) and re-suspended in BC50 (20 mM Tris, pH 7.6, 50 mM NaCl, 10% glycerol (v/v), 0.2 mM EDTA, 10 mM β-mercaptoethanol) and dialyzed against the same buffer. Salting-out was performed by adding ammonium sulfate to the indicated concentrations and centrifuging at 30,000 x g for 30 min. Ion exchange, gel filtration chromatography, immunoprecipitations, and silver stains were performed as described (Campos et al., 2010). Protein-protein interaction plots were generated by comparing the purified proteins to experimental results in STRING (Franceschini et al., 2013), and organized using Cytoscape (Shannon et al., 2003).

Density gradient sedimentation of recombinant proteins were performed as described (Campos et al., 2010) at 4°C using an SW60-Ti rotor (Beckman Coulter). Histone-TONSL-MMS22L interactions were resolved over 15-30% linear sucrose gradients in BC300 + 0.05% NP-40 (v/v), centrifuged at 42,000 RPM in for 16 hrs. *In vitro* translation was performed as described by the manufacturer (TNT system—Promega).

## **Enzymatic Assays**

Histone acetyltransferase and methyltransferase reactions were performed as described (Campos et al., 2010) using purified HeLa histones. Recombinant p300 (Abcam) and G9A (Abcam) were respectively used as positive controls. Kinase reactions were performed using [ $\gamma$ - $^{32}$ P] ATP (Perkin-Elmer) and 1  $\mu$ l of 1:10 dilutions of the eH3.1 fractions in 20 mM HEPES, pH 7.2, 25 mM KCl, 5 mM Mg(OAc) $_2$ , 10 mM (NH $_4$ ) $_2$ SO $_2$ , 0.1 mM EDTA and 20 pmoles of HeLa histones at 30°C for 30 min. CKII (Abcam) was used as a positive control. Samples were resolved by SDS-PAGE, coomassie-stained, and visualized by autoradiography. ATPase assays were performed on chromatinized plasmids generated by salt dialysis (Margueron et al., 2008), and performed as described using [ $\gamma$ - $^{32}$ P] ATP (Lee and Hurwitz, 2000) and recombinant RSF (Loyola et al., 2003) as a positive control. Recombinant PRC2 was purified as described (Margueron et al., 2008). Histone tetramers and sNASP-bound histones were selected by gel filtration and methylated using recombinant PRC2 as described (Margueron et al., 2008).

## **Label-free quantitative mass spectrometry**

S100, NE and SNP extracts were obtained as described above. 2-5 mg extract was incubated with 15  $\mu$ l M2 resin (Sigma-Aldrich) (Flag IP) or 15  $\mu$ l agarose beads (Chromotek) (control) for 90 min at 4°C in 430  $\mu$ l final volume containing 300 mM KCl, 0.15% NP-40 and 50 mg/ml ethidium bromide. All IPs were performed in triplicate. Beads were washed twice with 1 ml BC300 + 1% NP-40, twice with 1 ml PBS + 1% NP-40 and finally twice with 1 ml PBS. Bound proteins were eluted from the beads using two

30  $\mu$ l 200 mM glycine pH 2.5 elutions, which were incubated at 25°C for 5 min and subsequently neutralized in 10  $\mu$ l 1 M tris, pH 8. The eluted proteins were partially denatured and reduced in 2 M urea, 25 mM tris, pH 8.5 and 10 mM DTT for 20 min, after which they were alkylated with 50 mM IAA for 10 minutes and digested with 0.5  $\mu$ g trypsin (Promega) overnight at 25°C. Digested peptides were desalted and concentrated using C18 stagetips prior to online LC-MS/MS analysis. 120 minute gradients (6-75% acetonitrile) were applied (nanoLC1000, Thermo Scientific) and spectra were recorded on an Orbitrap Velos (Thermo Scientific), selecting the 15 most intense precursor ions for fragmentation for each full scan. Data analysis was done as described before (Smits et al., 2013). Top ontology terms, along with the terms ‘replication’, ‘transcription’, ‘DNA repair’, ‘chromatin assembly or disassembly’ and ‘chromatin modification’, were queried and compared to the input material using the DAVID functional annotation tool (Dennis et al., 2003).

### **Crosslinking and Mass Spectrometry Analysis**

*In vivo* crosslinking of cells was performed after a 3 hr release from a double-thymidine block, after which cells were trypsinized, washed, and resuspended at  $2.5 \times 10^7$  in PBS, pH 8 at room temperature (RT). DSS (Pierce) was added to 2 mM (final concentration) and the sample allowed to incubate for 30 min at RT with gentle rotation. The reaction was quenched by adding tris, pH 6.8 to 20 mM. The ensuing partial crosslinking allowed the immunoprecipitation of lysine-containing epitopes from cells in S-phase. Cells were gently pelleted at 800 x g and lysed in 5 pellet volumes of 20 mM tris, pH 6.8, 150 mM NaCl, 0.2 mM EDTA, 30% glycerol (v/v), 0.5 mM MgCl<sub>2</sub>, 0.5% NP-40 (v/v), 1 mM

DTT in the presence of protease inhibitors, and the DNA digested with 0.2 U/ml benzonase (Sigma-Aldrich) at 4°C with gentle rotation overnight. The samples were then centrifuged at 30,000 x g for 30 min to remove insoluble material. The resulting partial crosslinking allowed for subsequent immunoprecipitation using the lysine-containing FLAG epitope from the aforementioned stable clones. Immunoprecipitates were resolved by SDS-PAGE, coomassie-stained, and high molecular weight species excised for MS analysis.

For the analysis of protein-protein interactions, recombinant proteins were pre-incubated in 10 mM HEPES, pH 8, 150 mM NaCl for 30 min at RT. Crosslinking reactions were performed with DSS as described above. Crosslinked proteins were reduced with 20mM DTT, alkylated with 50 mM iodoacetamide, and digested using trypsin as described (Muellenbeck et al., 2013). Tryptic peptides were separated on an EASY spray 50cm C18 analytical HPLC column with <2 µm bead size using the auto sampler of an EASY-nLC 1000 HPLC and gradient eluted using a two hour gradient into a Q Exactive Orbitrap Mass spectrometer. High resolution full MS spectra were acquired with a resolution of 70,000, AGC target of 1e6, maximum ion time of 120ms, and scan range of 400 to 1500 m/z. Following each full MS twenty data-dependent high resolution HCD MS/MS spectra were acquired. All MS/MS spectra were collected using the following instrument parameters: resolution of 17,500, AGC target of 5e4, maximum ion time of 250ms, one microscan, 2m/z isolation window, fixed first mass of 150 m/z, and Normalized Collision Energy (NCE) of 27. For discovery of linear peptides, ions with charge state +2, +3, +4, +5 were selected for MS/MS, for the crosslink analysis only ions with charge state of +4, +5 and +6 were selected for MS/MS. The spectra for the linear

peptide analysis were searched against the Uniprot human database using Sequest within Proteome Discoverer. Cysteine carbamidomethylation was selected as static modification and oxidation of methionine, deamidation of glutamine and asparagine and monolink mass addition of 156.07864 Da on lysine residues and N-termini was selected as variable modification. Proteins with an FDR of 1% and at least two unique peptides were extracted to create a focused database for subsequent search of the crosslinked data. For identification of crosslinked peptides the data was searched against the focused database using the pLink (Yang et al., 2012) search algorithm including the static and variable modifications as above and the crosslink mass shift of 138.06809 Da. Hits with pLink scores below 1E-04 was excluded from the analysis and higher scoring spectra were manually verified.

### **DNA Supercoiling Assay**

Chromatin assembly and DNA supercoiling assay was done as described (Fyodorov and Kadonaga, 2003), with the following modifications. The drosophila topoisomerase fragment ND423 was expressed from BL21 cultures and purified over NiNTA resin (Qiagen) followed by anion exchange chromatography. One ng ND423 was used per 20 fmoles of circular plasmid, which was relaxed at 30°C for 30 min in 50 mM tris, pH 7.6, 10 mM MgCl<sub>2</sub>, 0.1 mM EDTA, 0.5 mM DTT, 50 µg/ml BSA. HeLa histone:histone chaperones were simultaneously incubated in Assembly Buffer (10 mM tris, pH 7.6, 100 mM KCl, 2 mM MgCl<sub>2</sub>, 1 mM DTT, 0.1 mg/ml BSA) at the desired molar ratios. Chaperone-mediated chromatin assembly was then performed by mixing 100 fmoles of the relaxed plasmid (directly from ND423 mixture) and 10 pmoles HeLa histone (from

the histone:chaperone mixture), with an equal reaction volume of 2X Assembly Buffer. Reactions proceeded at 37°C for 2.5 hrs and were stopped by adding an equal volume of 2X Stop Buffer (20 mM EDTA, pH 8, 0.5 mg/ml glycogen, 0.1% SDS (w/v)) and 2.5 µg proteinase K, and incubating at 50°C for 30 min. DNA was then extracted with phenol:chloroform, ethanol precipitated and resolved over an 0.8% agarose gel in the absence of intercalating agents. Gels were then stained with ethidium bromide and visualized under UV light. Yeast NAP-1 served as a positive control. The protein was expressed from BL21 cultures, purified over glutathione sepharose (GE Life Science), and the elutions further resolved by anion exchange chromatography.

### **Peptide pulldowns**

Biotinylated peptides spanning histone H3 1-21, 21-44, and 69-89 were purchased from Anaspec. 250 pmoles of peptides were immobilized onto 10 µl Strep-Tactin macroprep slurry (IBA) per pulldown. 10 pmoles of recombinant TONSL, TONSL-MMS22L, or protein fragments were incubated with the beads in 500 µl BC150 for 3 hrs at 4°C with gentle rotation. The resin was collected by centrifugation (1000 x g, 2 min, 4°C) and washed 3 x BC300 + 0.05% NP-40 (v/v) followed by a BC150 wash. Beads were resuspended in Laemmli buffer, boiled and resolved by SDS-PAGE for western analysis.

### **References**

Campos, E.I., Fillingham, J., Li, G., Zheng, H., Voigt, P., Kuo, W.H., Seepany, H., Gao, Z., Day, L.A., Greenblatt, J.F., *et al.* (2010). The program for processing newly synthesized histones H3.1 and H4. *Nat Struct Mol Biol* 17, 1343-1351.

Dennis, G., Jr., Sherman, B.T., Hosack, D.A., Yang, J., Gao, W., Lane, H.C., and Lempicki, R.A. (2003). DAVID: Database for Annotation, Visualization, and Integrated Discovery. *Genome biology* 4, P3.

Franceschini, A., Szklarczyk, D., Frankild, S., Kuhn, M., Simonovic, M., Roth, A., Lin, J., Minguez, P., Bork, P., von Mering, C., *et al.* (2013). STRING v9.1: protein-protein interaction networks, with increased coverage and integration. *Nucleic Acids Res* 41, D808-815.

Fyodorov, D.V., and Kadonaga, J.T. (2003). Chromatin assembly in vitro with purified recombinant ACF and NAP-1. *Methods Enzymol* 371, 499-515.

Lee, J.K., and Hurwitz, J. (2000). Isolation and characterization of various complexes of the minichromosome maintenance proteins of *Schizosaccharomyces pombe*. *J Biol Chem* 275, 18871-18878.

Loyola, A., Huang, J.Y., LeRoy, G., Hu, S., Wang, Y.H., Donnelly, R.J., Lane, W.S., Lee, S.C., and Reinberg, D. (2003). Functional analysis of the subunits of the chromatin assembly factor RSF. *Mol Cell Biol* 23, 6759-6768.

Margueron, R., Li, G., Sarma, K., Blais, A., Zavadil, J., Woodcock, C.L., Dynlacht, B.D., and Reinberg, D. (2008). Ezh1 and Ezh2 maintain repressive chromatin through different mechanisms. *Mol Cell* 32, 503-518.

Muellenbeck, M.F., Ueberheide, B., Amulic, B., Epp, A., Fenyó, D., Busse, C.E., Esen, M., Theisen, M., Mordmüller, B., and Wardemann, H. (2013). Atypical and classical memory B cells produce *Plasmodium falciparum* neutralizing antibodies. *The Journal of experimental medicine* 210, 389-399.



O'Donnell, L., Panier, S., Wildenhain, J., Tkach, J.M., Al-Hakim, A., Landry, M.C., Escribano-Diaz, C., Szilard, R.K., Young, J.T., Munro, M., *et al.* (2010). The MMS22L-TONSL complex mediates recovery from replication stress and homologous recombination. *Mol Cell* *40*, 619-631.

Shannon, P., Markiel, A., Ozier, O., Baliga, N.S., Wang, J.T., Ramage, D., Amin, N., Schwikowski, B., and Ideker, T. (2003). Cytoscape: a software environment for integrated models of biomolecular interaction networks. *Genome Res* *13*, 2498-2504.

Smits, A.H., Jansen, P.W., Poser, I., Hyman, A.A., and Vermeulen, M. (2013). Stoichiometry of chromatin-associated protein complexes revealed by label-free quantitative mass spectrometry-based proteomics. *Nucleic Acids Res* *41*, e28.

Tagami, H., Ray-Gallet, D., Almouzni, G., and Nakatani, Y. (2004). Histone H3.1 and H3.3 complexes mediate nucleosome assembly pathways dependent or independent of DNA synthesis. *Cell* *116*, 51-61.

Yang, B., Wu, Y.J., Zhu, M., Fan, S.B., Lin, J., Zhang, K., Li, S., Chi, H., Li, Y.X., Chen, H.F., *et al.* (2012). Identification of cross-linked peptides from complex samples. *Nat Methods* *9*, 904-906.
